# Supplementary material for: Increased COVID-19-related fear and subjective risk perception regarding COVID-19 affects behavior in individuals with internal high-risk diseases
Source: PubMed Central journal article supplement — J Prim Care Community Health. 2021 Mar 10;12:2150132721996898. doi: 10.1177/2150132721996898 (PMC8851367; doi:10.1177/2150132721996898), 2021-03-10
Supplement: sj-pdf-1-jpc-10.1177_2150132721996898.pdf [file sj-pdf-1-jpc-10.1177_2150132721996898.pdf]

## **Supplemental Online Material**

**Increased COVID-19-related fear and subjective risk perception regarding COVID-19 affects behaviour in individuals with internal high-risk diseases**

Kohler et al.

## Supplemental Analyses

### Marginal effects and regression analyses

In our main analyses, we reported univariate ANOVAs for the sake of simplicity and parsimony. F-values only indicate whether differences between groups exist in an analysis. Single group comparisons (so-called post hoc or marginal effects) must follow to draw conclusions about which of the groups differ from each other.

Furthermore, the reported differences might also result from an uneven distribution of participant characteristics. In order to assess if our results remain robust against such imbalances, we performed linear regression analyses with gender and age as covariates for each of the reported differences in the main manuscript. Marginal effects of the original omnibus-ANOVAs and the linear regression analyses are reported and compared in supplemental tables 1a-1n. The overall pattern from the ANOVAs can be reproduced in the linear regression analyses; only a few estimates differ, as highlighted in yellow color. Hence, conditioning on age on gender appears to leave the results unaffected.

Table 1a. Comparisons of marginal effects between ANOVA and regression / Health Status (healthy vs one risk disease vs two risk diseases vs multimorbid) on Fear of COVID-19

|                                  | Fear of COVID-19 |                            |               |                           |
|----------------------------------|------------------|----------------------------|---------------|---------------------------|
|                                  | ANOVA Estimate   | Linear Regression Estimate | ANOVA P-Value | Linear Regression P-Value |
| One Risk Disease vs Healthy      | 0.31             | 0.26                       | < .001        | < .001                    |
| One Risk Disease vs Multimorbid  | -0.25            | -0.22                      | 0.299         | 0.406                     |
| One Risk Disease vs Two Diseases | -0.27            | -0.26                      | 0.005         | 0.007                     |
| Healthy vs Multimorbid           | -0.57            | -0.48                      | < .001        | 0.004                     |
| Healthy vs Two Diseases          | -0.58            | -0.52                      | < .001        | < .001                    |
| Multimorbid vs Two Diseases      | -0.01            | -0.03                      | 1.000         | 0.996                     |

Table 1b. Comparisons of marginal effects between ANOVA and regression / Health Status (healthy vs one risk disease vs two risk diseases vs multimorbid) on Generalized Anxiety

|                                  | Generalized Anxiety (GAD-7) |                            |               |                           |
|----------------------------------|-----------------------------|----------------------------|---------------|---------------------------|
|                                  | ANOVA Estimate              | Linear Regression Estimate | ANOVA P-Value | Linear Regression P-Value |
| One Risk Disease vs Healthy      | 0.24                        | 0.78                       | 0.072         | < .001                    |
| One Risk Disease vs Multimorbid  | -0.76                       | -1.27                      | 0.212         | 0.005                     |
| One Risk Disease vs Two Diseases | -0.02                       | -0.40                      | 1.000         | 0.244                     |
| Healthy vs Multimorbid           | -1.00                       | -2.04                      | 0.045         | < .001                    |
| Healthy vs Two Diseases          | -0.26                       | -1.18                      | 0.564         | < .001                    |
| Multimorbid vs Two Diseases      | 0.74                        | 0.87                       | 0.316         | 0.167                     |

Table 1c. Comparisons of marginal effects between ANOVA and regression / Health Status (healthy vs one risk disease vs two risk diseases vs multimorbid) on Adherent Safety Behavior

|                                  | Adherent Safety Behavior |                            |               |                           |
|----------------------------------|--------------------------|----------------------------|---------------|---------------------------|
|                                  | ANOVA Estimate           | Linear Regression Estimate | ANOVA P-Value | Linear Regression P-Value |
| One Risk Disease vs Healthy      | 0.20                     | 0.11                       | < .001        | 0.005                     |
| One Risk Disease vs Multimorbid  | -0.33                    | -0.22                      | 0.047         | 0.273                     |
| One Risk Disease vs Two Diseases | -0.18                    | -0.13                      | 0.049         | 0.225                     |
| Healthy vs Multimorbid           | -0.53                    | -0.33                      | < .001        | 0.034                     |
| Healthy vs Two Diseases          | -0.38                    | -0.24                      | < .001        | 0.001                     |
| Multimorbid vs Two Diseases      | 0.15                     | 0.09                       | 0.721         | 0.908                     |

Table 1d. Comparisons of marginal effects between ANOVA and regression / Health Status (healthy vs one risk disease vs two risk diseases vs multimorbid) on Dysfunctional Safety Behavior

|                                  | Dysfunctional Safety Behavior |                            |               |                           |
|----------------------------------|-------------------------------|----------------------------|---------------|---------------------------|
|                                  | ANOVA Estimate                | Linear Regression Estimate | ANOVA P-Value | Linear Regression P-Value |
| One Risk Disease vs Healthy      | 0.17                          | 0.12                       | < .001        | < .001                    |
| One Risk Disease vs Multimorbid  | -0.28                         | -0.23                      | 0.033         | 0.107                     |
| One Risk Disease vs Two Diseases | -0.14                         | -0.11                      | 0.076         | 0.207                     |
| Healthy vs Multimorbid           | -0.45                         | -0.35                      | < .001        | 0.003                     |
| Healthy vs Two Diseases          | -0.31                         | -0.23                      | < .001        | < .001                    |
| Multimorbid vs Two Diseases      | 0.14                          | 0.12                       | 0.593         | 0.708                     |

Table 1e. Comparisons of marginal effects between ANOVA and regression / Health Status (healthy vs one risk disease vs two risk diseases vs multimorbid) on the risk to suffer from symptoms in case of a COVID-19 infection

|                                  | Subjective Risk Perception / Symptoms in Case of COVID-19 Infection |                            |               |                           |
|----------------------------------|---------------------------------------------------------------------|----------------------------|---------------|---------------------------|
|                                  | ANOVA Estimate                                                      | Linear Regression Estimate | ANOVA P-Value | Linear Regression P-Value |
| One Risk Disease vs Healthy      | 8.82                                                                | 8.35                       | < .001        | < .001                    |
| One Risk Disease vs Multimorbid  | -9.24                                                               | -8.73                      | < .001        | < .001                    |
| One Risk Disease vs Two Diseases | -6.35                                                               | -6.03                      | < .001        | < .001                    |
| Healthy vs Multimorbid           | -18.05                                                              | -17.07                     | < .001        | < .001                    |
| Healthy vs Two Diseases          | -15.17                                                              | -14.38                     | < .001        | < .001                    |
| Multimorbid vs Two Diseases      | 2.89                                                                | 2.70                       | 0.555         | 0.610                     |

Table 1f. Comparisons of marginal effects between ANOVA and regression / Health Status (healthy vs one risk disease vs two risk diseases vs multimorbid) on the risk to suffer of a severe course in case of a COVID-19 infection

|                                  | Subjective Risk Perception / Suffering of a severe Course in Case of Infection |                            |               |                           |
|----------------------------------|--------------------------------------------------------------------------------|----------------------------|---------------|---------------------------|
|                                  | ANOVA Estimate                                                                 | Linear Regression Estimate | ANOVA P-Value | Linear Regression P-Value |
| One Risk Disease vs Healthy      | 15.19                                                                          | 12.78                      | < .001        | < .001                    |
| One Risk Disease vs Multimorbid  | -22.13                                                                         | -19.76                     | < .001        | < .001                    |
| One Risk Disease vs Two Diseases | -13.74                                                                         | -12.11                     | < .001        | < .001                    |
| Healthy vs Multimorbid           | -37.33                                                                         | -32.54                     | < .001        | < .001                    |
| Healthy vs Two Diseases          | -28.93                                                                         | -24.89                     | < .001        | < .001                    |
| Multimorbid vs Two Diseases      | 8.39                                                                           | 7.66                       | < .001        | < .001                    |

Table 1g. Comparisons of marginal effects between ANOVA and regression / Health Status (healthy vs one risk disease vs two risk diseases vs multimorbid) on the risk to die in case of a COVID-19 infection

|                                  | Subjective Risk Perception / Dying in Case of an Infection |                   |         |                   |
|----------------------------------|------------------------------------------------------------|-------------------|---------|-------------------|
|                                  | ANOVA                                                      | Linear Regression | ANOVA   | Linear Regression |
|                                  | Estimate                                                   | Estimate          | P-Value | P-Value           |
| One Risk Disease vs Healthy      | 9.45                                                       | 7.68              | 0.000   | 0.000             |
| One Risk Disease vs Multimorbid  | -23.09                                                     | -21.06            | 0.000   | 0.000             |
| One Risk Disease vs Two Diseases | -11.07                                                     | -9.72             | 0.000   | 0.000             |
| Healthy vs Multimorbid           | -32.54                                                     | -28.75            | 0.000   | 0.000             |
| Healthy vs Two Diseases          | -20.52                                                     | -17.40            | 0.000   | 0.000             |
| Multimorbid vs Two Diseases      | 12.02                                                      | 11.35             | 0.000   | 0.000             |

Table 1h. Comparisons of marginal effects between ANOVA and regression / Type of Disease (healthy vs diabetes mellitus vs hypertonia vs chronic pulmonary disease vs cardiovascular diseases vs multimorbid) on Fear of COVID-19

|                                                       | Fear of COVID-19 |                   |         |                   |
|-------------------------------------------------------|------------------|-------------------|---------|-------------------|
|                                                       | ANOVA            | Linear Regression | ANOVA   | Linear Regression |
|                                                       | Estimate         | Estimate          | P-Value | P-Value           |
| Healthy vs Multimorbid                                | -0.58            | -0.50             | < .001  | < .001            |
| Healthy vs Arterial Hypertonia                        | -0.26            | -0.20             | < .001  | 0.001             |
| Healthy vs Chronic Pulmonary Diseases                 | -0.42            | -0.35             | < .001  | 0.000             |
| Healthy vs Diabetes Mellitus                          | 0.00             | 0.02              | 1.000   | 1.000             |
| Healthy vs Cardiovascular Diseases                    | -0.47            | -0.45             | 0.003   | 0.005             |
| Multimorbid vs Arterial Hypertonia                    | 0.32             | 0.31              | 0.001   | 0.001             |
| Multimorbid vs Chronic Pulmonary Diseases             | 0.16             | 0.15              | 0.414   | 0.507             |
| Multimorbid vs Diabetes Mellitus                      | 0.58             | 0.52              | 0.001   | 0.005             |
| Multimorbid vs Cardiovascular Diseases                | 0.11             | 0.05              | 0.973   | 0.999             |
| Arterial Hypertonia vs Chronic Pulmonary Diseases     | -0.16            | -0.16             | 0.275   | 0.251             |
| Arterial Hypertonia vs Diabetes Mellitus              | 0.26             | 0.22              | 0.431   | 0.629             |
| Arterial Hypertonia vs Cardiovascular Diseases        | -0.21            | -0.25             | 0.632   | 0.392             |
| Chronic Pulmonary Diseases vs Diabetes Mellitus       | 0.42             | 0.37              | 0.046   | 0.092             |
| Chronic Pulmonary Diseases vs Cardiovascular Diseases | -0.05            | -0.10             | 0.999   | 0.981             |
| Diabetes Mellitus vs Cardiovascular Diseases          | -0.47            | -0.47             | 0.107   | 0.097             |

Table 1i. Comparisons of marginal effects between ANOVA and regression / Type of Disease (healthy vs diabetes mellitus vs hypertonia vs chronic pulmonary disease vs cardiovascular diseases vs multimorbid) on Generalized Anxiety

|                                                       | Generalized Anxiety (GAD-7) |                   |         |                   |
|-------------------------------------------------------|-----------------------------|-------------------|---------|-------------------|
|                                                       | ANOVA                       | Linear Regression | ANOVA   | Linear Regression |
|                                                       | Estimate                    | Estimate          | P-Value | P-Value           |
| Healthy vs Multimorbid                                | -0.42                       | -1.34             | 0.182   | < .001            |
| Healthy vs Arterial Hypertonia                        | 0.39                        | -0.37             | 0.037   | 0.063             |
| Healthy vs Chronic Pulmonary Diseases                 | -1.18                       | -1.30             | < .001  | < .001            |
| Healthy vs Diabetes Mellitus                          | 0.37                        | -0.12             | 0.915   | 1.000             |
| Healthy vs Cardiovascular Diseases                    | -0.76                       | -1.53             | 0.230   | 0.000             |
| Multimorbid vs Arterial Hypertonia                    | 0.81                        | 0.96              | 0.002   | < .001            |
| Multimorbid vs Chronic Pulmonary Diseases             | -0.76                       | 0.04              | 0.014   | 1.000             |
| Multimorbid vs Diabetes Mellitus                      | 0.79                        | 1.22              | 0.359   | 0.023             |
| Multimorbid vs Cardiovascular Diseases                | -0.34                       | -0.19             | 0.951   | 0.996             |
| Arterial Hypertonia vs Chronic Pulmonary Diseases     | -1.58                       | -0.93             | < .001  | < .001            |
| Arterial Hypertonia vs Diabetes Mellitus              | -0.03                       | 0.26              | 1.000   | 0.983             |
| Arterial Hypertonia vs Cardiovascular Diseases        | -1.15                       | -1.16             | 0.019   | 0.014             |
| Chronic Pulmonary Diseases vs Diabetes Mellitus       | 1.55                        | 1.18              | 0.001   | 0.024             |
| Chronic Pulmonary Diseases vs Cardiovascular Diseases | 0.42                        | -0.23             | 0.866   | 0.989             |
| Diabetes Mellitus vs Cardiovascular Diseases          | -1.13                       | -1.41             | 0.204   | 0.041             |

Table 1j. Comparisons of marginal effects between ANOVA and regression / Type of Disease (healthy vs diabetes mellitus vs hypertonia vs chronic pulmonary disease vs cardiovascular diseases vs multimorbid) on Adherent Safety Behavior

|                                                   | Adherent Safety Behavior |                   |         |                   |
|---------------------------------------------------|--------------------------|-------------------|---------|-------------------|
|                                                   | ANOVA                    | Linear Regression | ANOVA   | Linear Regression |
|                                                   | Estimate                 | Estimate          | P-Value | P-Value           |
| Healthy vs Multimorbid                            | -0.41                    | -0.26             | < .001  | < .001            |
| Healthy vs Arterial Hypertonia                    | -0.21                    | -0.08             | < .001  | 0.370             |
| Healthy vs Chronic Pulmonary Diseases             | -0.21                    | -0.15             | 0.001   | 0.030             |
| Healthy vs Diabetes Mellitus                      | 0.00                     | 0.05              | 1.000   | 0.999             |
| Healthy vs Cardiovascular Diseases                | -0.27                    | -0.19             | 0.140   | 0.499             |
| Multimorbid vs Arterial Hypertonia                | 0.21                     | 0.17              | 0.039   | 0.114             |
| Multimorbid vs Chronic Pulmonary Diseases         | 0.20                     | 0.11              | 0.075   | 0.706             |
| Multimorbid vs Diabetes Mellitus                  | 0.41                     | 0.30              | 0.019   | 0.157             |
| Multimorbid vs Cardiovascular Diseases            | 0.14                     | 0.07              | 0.861   | 0.994             |
| Arterial Hypertonia vs Chronic Pulmonary Diseases | 0.00                     | -0.07             | 1.000   | 0.898             |
| Arterial Hypertonia vs Diabetes Mellitus          | 0.21                     | 0.13              | 0.549   | 0.888             |
| Arterial Hypertonia vs Cardiovascular Diseases    | -0.06                    | -0.11             | 0.995   | 0.941             |
| Chronic Pulmonary Diseases vs Diabetes Mellitus   | 0.21                     | 0.20              | 0.567   | 0.601             |

|                                                       |       |       |       |       |
|-------------------------------------------------------|-------|-------|-------|-------|
| Chronic Pulmonary Diseases vs Cardiovascular Diseases | -0.06 | -0.04 | 0.996 | 0.999 |
| Diabetes Mellitus vs Cardiovascular Diseases          | -0.27 | -0.24 | 0.545 | 0.659 |

Table 1k. Comparisons of marginal effects between ANOVA and regression / Type of Disease (healthy vs diabetes mellitus vs hypertonia vs chronic pulmonary disease vs cardiovascular diseases vs multimorbid) on Dysfunctional Safety Behavior

|                                                       | Dysfunctional Safety Behavior |                            |               |                           |
|-------------------------------------------------------|-------------------------------|----------------------------|---------------|---------------------------|
|                                                       | ANOVA Estimate                | Linear Regression Estimate | ANOVA P-Value | Linear Regression P-Value |
| Healthy vs Multimorbid                                | -0.34                         | -0.25                      | < .001        | < .001                    |
| Healthy vs Arterial Hypertonia                        | -0.15                         | -0.08                      | < .001        | 0.274                     |
| Healthy vs Chronic Pulmonary Diseases                 | -0.17                         | -0.14                      | < .001        | 0.009                     |
| Healthy vs Diabetes Mellitus                          | -0.17                         | -0.12                      | 0.488         | 0.794                     |
| Healthy vs Cardiovascular Diseases                    | -0.34                         | -0.29                      | 0.002         | 0.013                     |
| Multimorbid vs Arterial Hypertonia                    | 0.19                          | 0.18                       | 0.010         | 0.021                     |
| Multimorbid vs Chronic Pulmonary Diseases             | 0.17                          | 0.11                       | 0.069         | 0.442                     |
| Multimorbid vs Diabetes Mellitus                      | 0.17                          | 0.13                       | 0.571         | 0.803                     |
| Multimorbid vs Cardiovascular Diseases                | 0.00                          | -0.04                      | 1.000         | 0.999                     |
| Arterial Hypertonia vs Chronic Pulmonary Diseases     | -0.02                         | -0.06                      | 0.997         | 0.817                     |
| Arterial Hypertonia vs Diabetes Mellitus              | -0.02                         | -0.04                      | 1.000         | 0.998                     |
| Arterial Hypertonia vs Cardiovascular Diseases        | -0.20                         | -0.22                      | 0.306         | 0.190                     |
| Chronic Pulmonary Diseases vs Diabetes Mellitus       | 0.01                          | 0.02                       | 1.000         | 1.000                     |
| Chronic Pulmonary Diseases vs Cardiovascular Diseases | -0.17                         | -0.15                      | 0.495         | 0.611                     |
| Diabetes Mellitus vs Cardiovascular Diseases          | -0.18                         | -0.17                      | 0.748         | 0.760                     |

Table 1l. Comparisons of marginal effects between ANOVA and regression / Type of Disease (healthy vs diabetes mellitus vs hypertonia vs chronic pulmonary disease vs cardiovascular diseases vs multimorbid) on the risk to suffer from symptoms in case of a COVID-19 infection

|                                                       | Subjective Risk Perception / Symptoms in Case of COVID-19 Infection |                            |               |                           |
|-------------------------------------------------------|---------------------------------------------------------------------|----------------------------|---------------|---------------------------|
|                                                       | ANOVA Estimate                                                      | Linear Regression Estimate | ANOVA P-Value | Linear Regression P-Value |
| Healthy vs Multimorbid                                | -15.79                                                              | -14.66                     | < .001        | < .001                    |
| Healthy vs Arterial Hypertonia                        | -5.49                                                               | -4.67                      | < .001        | < .001                    |
| Healthy vs Chronic Pulmonary Diseases                 | -14.30                                                              | -13.91                     | < .001        | < .001                    |
| Healthy vs Diabetes Mellitus                          | -4.99                                                               | -4.58                      | 0.075         | 0.130                     |
| Healthy vs Cardiovascular Diseases                    | -9.40                                                               | -8.66                      | < .001        | < .001                    |
| Multimorbid vs Arterial Hypertonia                    | 10.29                                                               | 9.99                       | < .001        | < .001                    |
| Multimorbid vs Chronic Pulmonary Diseases             | 1.49                                                                | 0.75                       | 0.813         | 0.989                     |
| Multimorbid vs Diabetes Mellitus                      | 10.79                                                               | 10.07                      | < .001        | < .001                    |
| Multimorbid vs Cardiovascular Diseases                | 6.38                                                                | 6.00                       | 0.014         | 0.027                     |
| Arterial Hypertonia vs Chronic Pulmonary Diseases     | -8.80                                                               | -9.24                      | < .001        | < .001                    |
| Arterial Hypertonia vs Diabetes Mellitus              | 0.50                                                                | 0.08                       | 1.000         | 1.000                     |
| Arterial Hypertonia vs Cardiovascular Diseases        | -3.91                                                               | -3.99                      | 0.282         | 0.259                     |
| Chronic Pulmonary Diseases vs Diabetes Mellitus       | 9.30                                                                | 9.32                       | < .001        | < .001                    |
| Chronic Pulmonary Diseases vs Cardiovascular Diseases | 4.90                                                                | 5.25                       | 0.105         | 0.066                     |
| Diabetes Mellitus vs Cardiovascular Diseases          | -4.41                                                               | -4.08                      | 0.503         | 0.590                     |

Table 1m. Comparisons of marginal effects between ANOVA and regression / Type of Disease (healthy vs diabetes mellitus vs hypertonia vs chronic pulmonary disease vs cardiovascular diseases vs multimorbid) on the risk to suffer of a severe course in case of a COVID-19 infection

|                                                       | Subjective Risk Perception / Suffering of a severe Course in Case of Infection |                            |               |                           |
|-------------------------------------------------------|--------------------------------------------------------------------------------|----------------------------|---------------|---------------------------|
|                                                       | ANOVA Estimate                                                                 | Linear Regression Estimate | ANOVA P-Value | Linear Regression P-Value |
| Healthy vs Multimorbid                                | -30.74                                                                         | -26.08                     | < .001        | < .001                    |
| Healthy vs Arterial Hypertonia                        | -10.13                                                                         | -6.52                      | < .001        | < .001                    |
| Healthy vs Chronic Pulmonary Diseases                 | -21.91                                                                         | -20.57                     | < .001        | < .001                    |
| Healthy vs Diabetes Mellitus                          | -12.83                                                                         | -11.05                     | < .001        | < .001                    |
| Healthy vs Cardiovascular Diseases                    | -21.20                                                                         | -17.93                     | < .001        | < .001                    |
| Multimorbid vs Arterial Hypertonia                    | 20.60                                                                          | 19.56                      | < .001        | < .001                    |
| Multimorbid vs Chronic Pulmonary Diseases             | 8.83                                                                           | 5.51                       | < .001        | < .001                    |
| Multimorbid vs Diabetes Mellitus                      | 17.91                                                                          | 15.03                      | < .001        | < .001                    |
| Multimorbid vs Cardiovascular Diseases                | 9.54                                                                           | 8.15                       | < .001        | < .001                    |
| Arterial Hypertonia vs Chronic Pulmonary Diseases     | -11.78                                                                         | -14.05                     | < .001        | < .001                    |
| Arterial Hypertonia vs Diabetes Mellitus              | -2.69                                                                          | -4.53                      | 0.640         | 0.089                     |
| Arterial Hypertonia vs Cardiovascular Diseases        | -11.07                                                                         | -11.41                     | < .001        | < .001                    |
| Chronic Pulmonary Diseases vs Diabetes Mellitus       | 9.08                                                                           | 9.52                       | < .001        | < .001                    |
| Chronic Pulmonary Diseases vs Cardiovascular Diseases | 0.71                                                                           | 2.64                       | 0.998         | 0.621                     |
| Diabetes Mellitus vs Cardiovascular Diseases          | -8.37                                                                          | -6.88                      | 0.003         | 0.025                     |

Table 1n. Comparisons of marginal effects between ANOVA and regression / Type of Disease (healthy vs diabetes mellitus vs hypertonia vs chronic pulmonary disease vs cardiovascular diseases vs multimorbid) on the risk to die in case of a COVID-19 infection

Subjective Risk Perception / Dying in Case of an Infection

|                                                       | ANOVA<br>Estimate | Linear Regression<br>Estimate | ANOVA<br>P-Value | Linear Regression<br>P-Value |
|-------------------------------------------------------|-------------------|-------------------------------|------------------|------------------------------|
| Healthy vs Multimorbid                                | -23.10            | -19.54                        | < .001           | < .001                       |
| Healthy vs Arterial Hypertonia                        | -6.10             | -3.49                         | < .001           | < .001                       |
| Healthy vs Chronic Pulmonary Diseases                 | -13.23            | -12.30                        | < .001           | < .001                       |
| Healthy vs Diabetes Mellitus                          | -9.47             | -8.20                         | < .001           | < .001                       |
| Healthy vs Cardiovascular Diseases                    | -15.28            | -12.67                        | < .001           | < .001                       |
| Multimorbid vs Arterial Hypertonia                    | 16.99             | 16.05                         | < .001           | < .001                       |
| Multimorbid vs Chronic Pulmonary Diseases             | 9.87              | 7.24                          | < .001           | < .001                       |
| Multimorbid vs Diabetes Mellitus                      | 13.63             | 11.34                         | < .001           | < .001                       |
| Multimorbid vs Cardiovascular Diseases                | 7.81              | 6.87                          | < .001           | < .001                       |
| Arterial Hypertonia vs Chronic Pulmonary Diseases     | -7.12             | -8.81                         | < .001           | < .001                       |
| Arterial Hypertonia vs Diabetes Mellitus              | -3.37             | -4.70                         | 0.180            | 0.012                        |
| Arterial Hypertonia vs Cardiovascular Diseases        | -9.18             | -9.18                         | 0.000            | < .001                       |
| Chronic Pulmonary Diseases vs Diabetes Mellitus       | 3.75              | 4.10                          | 0.113            | 0.055                        |
| Chronic Pulmonary Diseases vs Cardiovascular Diseases | -2.06             | -0.37                         | 0.692            | 1.000                        |
| Diabetes Mellitus vs Cardiovascular Diseases          | -5.81             | -4.47                         | 0.024            | 0.150                        |
